# Supplementary material for: Development and validation of a robust multigene signature as an aid to predict early relapse in stage I-III clear cell and papillary renal cell cancer
Source: PubMed Central journal article supplement (PMC6959077; doi:10.7150/jca.38274), 2020-01-01
Supplement: jcav11p0997s1.pdf [file jcav11p0997s1.pdf]

**Supplemental Table 1. The primer sequences for qRT-PCR assay**

| Gene name      | Number | Primer                  |
|----------------|--------|-------------------------|
| AFP            | F      | CTTTGGGCTGCTCGCTATGA    |
|                | R      | GCATGTTGATTTAACAAGCTGCT |
| ATP6V0D2       | F      | TCTCACCTATATGACGTGCAGT  |
|                | R      | GGTGGCACTTCCCCAGAATTT   |
| COL22A1        | F      | CCTAGCGTTCGTGTAGAAGGA   |
|                | R      | CCCATCCGTACATAGGAACTCT  |
| EN2            | F      | CCGGCGTGGGTCTACTGTA     |
|                | R      | CCTCTTTGTTCTGGGTTCTTCTT |
| EYA1           | F      | CACCACAGATTTACCCTTCCAAC |
|                | R      | GTACGTGGCATAGGCTGTAGC   |
| HOXA13         | F      | CTGCCCTATGGCTACTTCGG    |
|                | R      | CCGGCGGTATCCATGTACT     |
| IGF2BP3        | F      | TATATCGGAAACCTCAGCGAGA  |
|                | R      | GGACCGAGTGCTCAACTTCT    |
| IGSF9          | F      | GAAGCCTGAGGTGGTATCGG    |
|                | R      | CAGCCACTCGATGACATGC     |
| ITGAD          | F      | TCGGTGGATCTCGACTCGT     |
|                | R      | GCAGGAACCCTTTGAGTATGAG  |
| KCNJ1          | F      | ATGACCCTCTACCGGGAGAC    |
|                | R      | TGATGCCGCCTACGTTGATG    |
| MT1X           | F      | TCCTGCAAGAAGAGCTGCTG    |
|                | R      | TGTCTGACGTCCCTTTGCAG    |
| PGAM2          | F      | AGAAGCACCCCTACTACAACCTC |
|                | R      | TCTGGGGAACAATCTCCTCGT   |
| RZR2           | F      | ACAACAGAAGCTATGCTTGGC   |
|                | R      | GAGGAGTGTTTCGATGACCACC  |
| SLC22A2        | F      | AGACAGTGTAGGCGCTACGA    |
|                | R      | CATCGTCACCGAGTTTAACCTG  |
| STRA6          | F      | CCACAGAGGACTACTCCTATGG  |
|                | R      | CAGCACAAGGATTGACAGCG    |
| STXBP6         | F      | TTCTTGGCAACTGGAGGTCAA   |
|                | R      | TCGATACCATTAACCTGGCGAA  |
| ZIC2           | F      | GCGCAACTCCACAACCAGTA    |
|                | R      | TGCCGCATATAGCGGAAAAAG   |
| $\beta$ -actin | F      | CATGTACGTTGCTATCCAGGC   |
|                | R      | CTCCTTAATGTCACGCACGAT   |
